# Supplementary material
Source: PubMed Central journal article supplement (PMC4790602)
Supplement: rust001641.ww1_default.pdf [file rust001641.ww1_default.pdf]

## WEB APPENDIX: SUPPLEMENTARY MATERIAL

**Web table 1.** Survey participants who consented and did not consent to record linkage: follow-up of ten cohort studies from the Health Survey for England ( $N = 68,222$ )

| <i>Covariate</i>                                            | <i>Consented</i> | <i>Did not consent</i> | <i>p</i> |
|-------------------------------------------------------------|------------------|------------------------|----------|
| N                                                           | 75936            | 9325                   |          |
| Age (mean, SD)                                              | 56.1 (14.4)      | 64.7 (17.7)            | <0.001   |
| Female (%)                                                  | 54.9             | 64.2                   | <0.001   |
| Individual occupational social class (% I-IIINM)            | 56.4             | 52.2                   | <0.001   |
| Body mass index (kg/m <sup>2</sup> ; mean, SD)              | 27.2 (4.7)       | 27.0 (4.8)             | 0.001    |
| Systolic blood pressure <sup>1</sup> (mmHg, mean, SD)       | 137.6 (20.6)     | 136.9 (21.3)           | 0.096    |
| Physical activity <sup>2</sup> (%)                          | 65.3             | 71.4                   | <0.001   |
| Current smoker (%)                                          | 22.3             | 18.9                   | <0.001   |
| Drinks more than recommended alcohol limit <sup>3</sup> (%) | 20.3             | 14.3                   | <0.001   |
| Cardiovascular disease <sup>4</sup> (%)                     | 4.8              | 6.4                    | <0.001   |
| Cancer (%)                                                  | 2.2              | 2.6                    | 0.008    |
| Diabetes (%)                                                | 3.7              | 4.8                    | <0.001   |

<sup>1</sup> Mean of 2<sup>nd</sup> and 3<sup>rd</sup> readings

<sup>2</sup> Binary variable: any weekly moderate to vigorous physical activity

<sup>3</sup> Calculated using sex-specific safe limits:  $\leq 14$  units per week for women and  $\leq 21$  units for men

<sup>4</sup> Including angina, myocardial infarction and haemorrhagic or thrombotic stroke

**Web table 2.** Survey participants included and excluded from fully-adjusted model: follow-up of ten cohort studies from the Health Survey for England ( $N = 68,222$ )

| <i>Covariate</i>                                            | <i>Complete data for all variables</i> | <i>Missing data in <math>\geq 1</math> variable</i> | <i>p</i> |
|-------------------------------------------------------------|----------------------------------------|-----------------------------------------------------|----------|
| N                                                           | 41362                                  | 26860                                               |          |
| Age (mean, SD)                                              | 54.1 (13.4)                            | 56.5 (15.0)                                         | <0.001   |
| Female (%)                                                  | 53.3                                   | 58.1                                                | <0.001   |
| Individual occupational social class (% I-IIIINM)           | 57.3                                   | 58.0                                                | 0.355    |
| Body mass index (kg/m <sup>2</sup> ; mean, SD)              | 27.0 (4.6)                             | 27.4 (4.9)                                          | <0.001   |
| Systolic blood pressure <sup>1</sup> (mmHg, mean, SD)       | 137.7 (20.2)                           | 135.1 (21.1)                                        | <0.001   |
| Physical activity <sup>2</sup> (%)                          | 72.3                                   | 57.6                                                | <0.001   |
| Current smoker (%)                                          | 23.0                                   | 22.0                                                | 0.001    |
| Drinks more than recommended alcohol limit <sup>3</sup> (%) | 21.8                                   | 18.4                                                | <0.001   |
| Diabetes (%)                                                | 2.7                                    | 3.9                                                 | <0.001   |

<sup>1</sup> Mean of 2<sup>nd</sup> and 3<sup>rd</sup> readings

<sup>2</sup> Binary variable: any weekly moderate to vigorous physical activity

<sup>3</sup> Calculated using sex-specific safe limits:  $\leq 14$  units per week for women and  $\leq 21$  units for men

**Web table 3.** Sub-group analysis—excluding deaths within five years of follow-up: follow-up of ten cohort studies from the Health Survey for England ( $N = 68,222$ )

| <i>Basic model adjusted for age and sex</i> | <i>Deaths</i> | <i>n</i> | <i>1 SD<br/>disadvantage in<br/>GHQ-12 score<sup>1</sup><br/>HR</i> | <i>p (trend)</i> |
|---------------------------------------------|---------------|----------|---------------------------------------------------------------------|------------------|
| <b>Total mortality</b>                      |               |          |                                                                     |                  |
| All deaths                                  | 8365          | 68222    | 1.21<br>(1.15, 1.27)                                                | <0.001           |
| Deaths of individuals who survived >5 years | 4011          | 55845    | 1.13<br>(1.10, 1.17)                                                | <0.001           |
| <b>Cardiovascular disease mortality</b>     |               |          |                                                                     |                  |
| All deaths                                  | 3382          | 68222    | 1.22<br>(1.14, 1.31)                                                | <0.001           |
| Deaths of individuals who survived >5 years | 1574          | 55845    | 1.17<br>(1.10, 1.24)                                                | <0.001           |
| <b>Cancer mortality</b>                     |               |          |                                                                     |                  |
| All deaths                                  | 2552          | 68222    | 1.09<br>(1.04, 1.13)                                                | <0.001           |
| Deaths of individuals who survived >5 years | 1253          | 55845    | 1.03<br>(0.97, 1.09)                                                | 0.359            |

<sup>1</sup> GHQ-12 score standardised with sex-specific standard deviations

<sup>2</sup> Cardiovascular disease comprises ischaemic heart disease, stroke, peripheral vascular disease, and heart failure

**Web table 4.** Sub-group analysis—Hazard ratios (95% confidence interval) for the association of psychological distress with cause-specific mortality with broad and narrow definitions<sup>1</sup> of disease: follow-up of ten cohort studies from the Health Survey for England ( $N = 68,222$ )

|                                                     | <b>Broad case definition<sup>1</sup></b> |                                                                   | <b>Narrow case definition<sup>1</sup></b> |                                                                   |
|-----------------------------------------------------|------------------------------------------|-------------------------------------------------------------------|-------------------------------------------|-------------------------------------------------------------------|
|                                                     | <i>Deaths</i>                            | <i>1 SD disadvantage in GHQ-12 score<sup>2</sup></i><br><i>HR</i> | <i>Deaths</i>                             | <i>1 SD disadvantage in GHQ-12 score<sup>2</sup></i><br><i>HR</i> |
| <b>Cardiovascular disease<sup>3</sup> mortality</b> |                                          |                                                                   |                                           |                                                                   |
| Age- & sex-adjusted                                 | 3382                                     | 1.23<br>(1.14, 1.33)                                              | 2585                                      | 1.21<br>(1.12, 1.30)                                              |
| <b>Cancer mortality</b>                             |                                          |                                                                   |                                           |                                                                   |
| Age- & sex-adjusted                                 | 2552                                     | 1.09<br>(1.05, 1.14)                                              | 2329                                      | 1.07<br>(1.03, 1.12)                                              |
| <b>External cause mortality</b>                     |                                          |                                                                   |                                           |                                                                   |
| Age- & sex-adjusted                                 | 386                                      | 1.26<br>(1.14, 1.40)                                              | 201                                       | 1.28<br>(1.13, 1.44)                                              |

<sup>1</sup> Broad definition indicates any mention of the condition on the death certificate; narrow definition indicates that the condition was the underlying cause of death

<sup>2</sup> GHQ-12 score standardised with sex-specific standard deviations

<sup>3</sup> Cardiovascular disease comprises ischaemic heart disease, stroke, peripheral vascular disease, and heart failure
